# Supplementary material for: Biodistribution Analysis of Oncolytic Adenoviruses in Canine Patient Necropsy Samples Treated with Cellular Virotherapy
Source: PubMed Central journal article supplement — Mol Ther Oncolytics. 2020 Aug 14;18:525–34. doi: 10.1016/j.omto.2020.08.006 (PMC7490470; doi:10.1016/j.omto.2020.08.006), 2020-08-14
Supplement: mmc1.pdf [file mmc1.pdf]

**OMTO, Volume 18**

## **Supplemental Information**

### **Biodistribution Analysis of Oncolytic**

### **Adenoviruses in Canine Patient Necropsy**

### **Samples Treated with Cellular Virotherapy**

**Ana Gómez, David Sardón, Teresa Cejalvo, Fernando Vázquez, Javier García-Castro, and Ana Judith Perisé-Barrios**

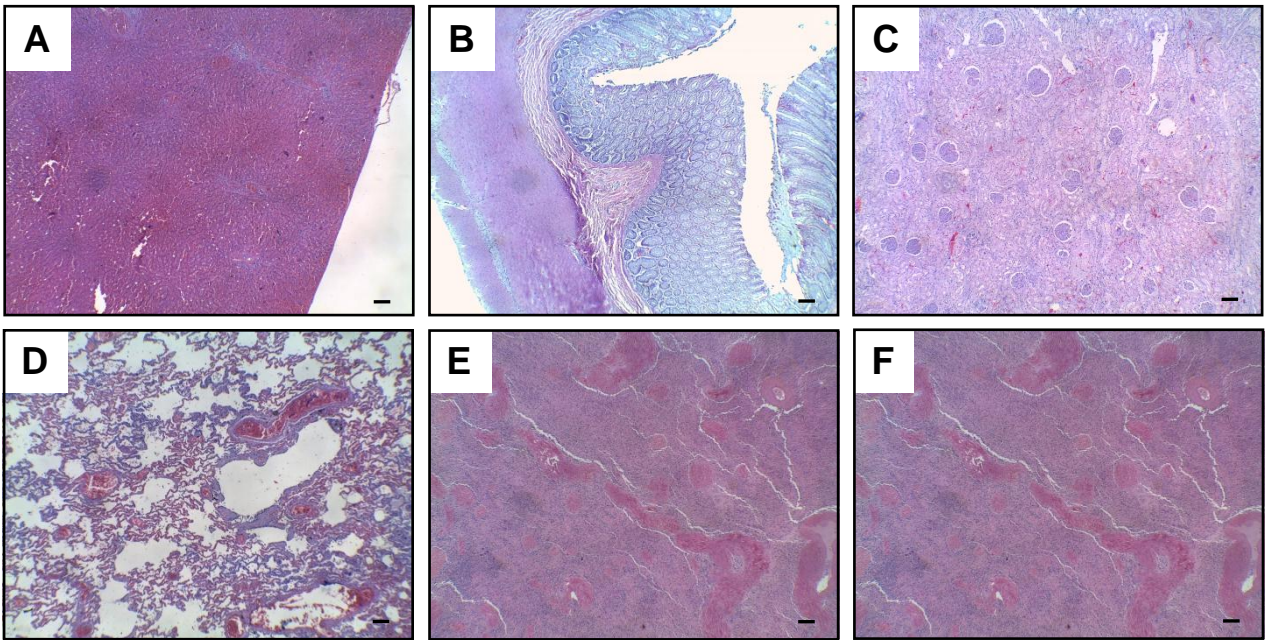

**Figure S1. Tissues from oncologic patients treated with conventional treatment are shown.** Representative images of hematoxylin and eosin stained necropsy samples from liver (A), gastrointestinal tract (B), kidney (C), lung (D), spleen (E) and pancreas (F) are shown. Scale bar: 100  $\mu$ m.
